# Supplementary material for: A gene signature related to programmed cell death to predict immunotherapy response and prognosis in colon adenocarcinoma
Source: PeerJ. 2025 Feb 10;13:e18895. doi: 10.7717/peerj.18895 (PMC11823652; doi:10.7717/peerj.18895)
Supplement: Supplemental Information 3 [file peerj-13-18895-s003.xls]

## Sheet: Sheet1
ITEM TO CHECK	IMPORTANCE	CHECKLIST
EXPERIMENTAL DESIGN
Definition of experimental and control groups	E	page4line 99-103
Number within each group	E	page4line 99-103
Assay carried out by core lab or investigator's lab?	D	Not Applicable
Acknowledgement of authors' contributions	D	Not Applicable
SAMPLE
Description	E	page6line 164-171
Volume/mass of sample processed	D	Not Applicable
Microdissection or macrodissection	E	page6line 164-171
Processing procedure	E	page6line 164-171
If frozen - how and how quickly?	E	page6line 164-171
If fixed - with what, how quickly?	E	page6line 164-171
Sample storage conditions and duration (especially for FFPE samples)	E	page6line 164-171
NUCLEIC ACID EXTRACTION
Procedure and/or instrumentation	E	page6line 164-171
Name of kit and details of any modifications	E	page6line 164-171
Source of additional reagents used	D	Not Applicable
Details of DNase or RNAse treatment	E	page6line 164-171
Contamination assessment (DNA or RNA)	E	page6line 164-171
Nucleic acid quantification	E	page6line 164-171
Instrument and method	E	page6line 164-171
Purity (A260/A280)	D	Not Applicable
Yield	D	Not Applicable
RNA integrity method/instrument	E	page6line 164-171
RIN/RQI or Cq of 3' and 5' transcripts	E	page6line 164-171
Electrophoresis traces	D	Not Applicable
Inhibition testing (Cq dilutions, spike or other)	E	page6line 164-171
REVERSE TRANSCRIPTION
Complete reaction conditions	E	page6line 164-171
Amount of RNA and reaction volume	E	page6line 164-171
Priming oligonucleotide (if using GSP) and concentration	E	page6line 164-171
Reverse transcriptase and concentration	E	page6line 164-171
Temperature and time	E	page6line 164-171
Manufacturer of reagents and catalogue numbers	D	Not Applicable
Cqs with and without RT	D*	Not Applicable
Storage conditions of cDNA	D	Not Applicable
qPCR TARGET INFORMATION
If multiplex, efficiency and LOD of each assay.	E	page6line 164-171
Sequence accession number	E	page6line 164-171
Location of amplicon	D	Not Applicable
Amplicon length	E	page6line 164-171
In silico specificity screen (BLAST, etc)	E	page6line 164-171
Pseudogenes, retropseudogenes or other homologs?	D	Not Applicable
Sequence alignment	D	Not Applicable
Secondary structure analysis of amplicon	D	Not Applicable
Location of each primer by exon or intron (if applicable)	E	page6line 164-171
What splice variants are targeted?	E	page6line 164-171
qPCR OLIGONUCLEOTIDES
Primer sequences	E	page6line 164-171
RTPrimerDB Identification Number	D	Not Applicable
Probe sequences	D**	Not Applicable
Location and identity of any modifications	E	page6line 164-171
Manufacturer of oligonucleotides	D	Not Applicable
Purification method	D	Not Applicable
qPCR PROTOCOL
Complete reaction conditions	E	page6line 164-171
Reaction volume and amount of cDNA/DNA	E	page6line 164-171
Primer, (probe), Mg++ and dNTP concentrations	E	page6line 164-171
Polymerase identity and concentration	E	page6line 164-171
Buffer/kit identity and manufacturer	E	page6line 164-171
Exact chemical constitution of the buffer	D	Not Applicable
Additives (SYBR Green I, DMSO, etc.)	E	page6line 164-171
Manufacturer of plates/tubes and catalog number	D	Not Applicable
Complete thermocycling parameters	E	page6line 164-171
Reaction setup (manual/robotic)	D	Not Applicable
Manufacturer of qPCR instrument	E	page6line 164-171
qPCR VALIDATION
Evidence of optimisation (from gradients)	D	Not Applicable
Specificity (gel, sequence, melt, or digest)	E	page6line 164-171
For SYBR Green I, Cq of the NTC	E	page6line 164-171
Standard curves with slope and y-intercept	E	page6line 164-171
PCR efficiency calculated from slope	E	page6line 164-171
Confidence interval for PCR efficiency or standard error	D	Not Applicable
r2 of standard curve	E	page6line 164-171
Linear dynamic range	E	page6line 164-171
Cq variation at lower limit	E	page6line 164-171
Confidence intervals throughout range	D	Not Applicable
Evidence for limit of detection	E	page6line 164-171
If multiplex, efficiency and LOD of each assay.	E	page6line 164-171
DATA ANALYSIS
qPCR analysis program (source, version)	E	page6line 164-171
Cq method determination	E	page6line 164-171
Outlier identification and disposition	E	page6line 164-171
Results of NTCs	E	page6line 164-171
Justification of number and choice of reference genes	E	page6line 164-171
Description of normalisation method	E	page6line 164-171
Number and concordance of biological replicates	D	Not Applicable
Number and stage (RT or qPCR) of technical replicates	E	page6line 164-171
Repeatability (intra-assay variation)	E	page6line 164-171
Reproducibility (inter-assay variation, %CV)	D	Not Applicable
Power analysis	D	Not Applicable
Statistical methods for result significance	E	page6line 164-171
Software (source, version)	E	page6line 164-171
Cq or raw data submission using RDML	D	Not Applicable
Table 1. MIQE checklist for authors, reviewers and editors. All essential information (E) must be submitted with the manuscript. Desirable
information (D) should be submitted if available. If using primers obtained from RTPrimerDB, information on qPCR target, oligonucleotides,
protocols and validation is available from that source.
*: Assessing the absence of DNA using a no RT assay is essential when first extracting RNA. Once the sample has been validated as
RDNA-free, inclusion of a no-RT control is desirable, but no longer essential.
**: Disclosure of the probe sequence is highly desirable and strongly encouraged. However, since not all commercial pre-designed assay
vendors provide this information, it cannot be an essential requirement. Use of such assays is advised against.
